# Supplementary material for: USP10 is a critical factor for Tau-positive stress granule formation in neuronal cells
Source: PubMed Central journal article supplement (PMC6646309; doi:10.1038/s41598-019-47033-7), 2019-07-22
Supplement: 41598_2019_47033_MOESM1_ESM.pdf [file 41598_2019_47033_MOESM1_ESM.pdf]

## Supplementary Information

### **USP10 is a critical factor for Tau-positive stress granule formation in neuronal cells**

Svetlana Piatnitskaia,<sup>1,\*</sup> Masahiko Takahashi,<sup>1,\*</sup> Hiroki Kitaura,<sup>2</sup> Yoshinori Katsuragi,<sup>1</sup> Taichi Kakihana,<sup>1</sup> Lu Zhang,<sup>2</sup> Akiyoshi Kakita,<sup>2</sup> Yuriko Iwakura,<sup>3</sup> Hiroyuki Nawa,<sup>3</sup> Takeshi Miura,<sup>4</sup> Takeshi Ikeuchi,<sup>4</sup> Toshifumi Hara,<sup>5</sup> Masahiro Fujii<sup>1</sup>

<sup>1</sup>Division of Virology, Niigata University Graduate School of Medical and Dental Sciences, Niigata, 951-8510, Japan

<sup>2</sup>Department of Pathology, Brain Research Institute, Niigata University, Niigata, 951-8585, Japan

<sup>3</sup>Department of Molecular Neurobiology, Brain Research Institute, Niigata University, Niigata, 951-8585, Japan

<sup>4</sup>Department of Molecular Genetics, Brain Research Institute, Niigata University, Niigata, 951-8585, Japan.

<sup>5</sup>Department of Medicinal Biochemistry, School of Pharmacy, Aichi Gakuin University, Nagoya, Japan.

\*These two authors contributed equally to this study.

Correspondence and requests for materials should be addressed to M.F. (e-mail: [fujiiimas@med.niigata-u.ac.jp](mailto:fujiiimas@med.niigata-u.ac.jp))

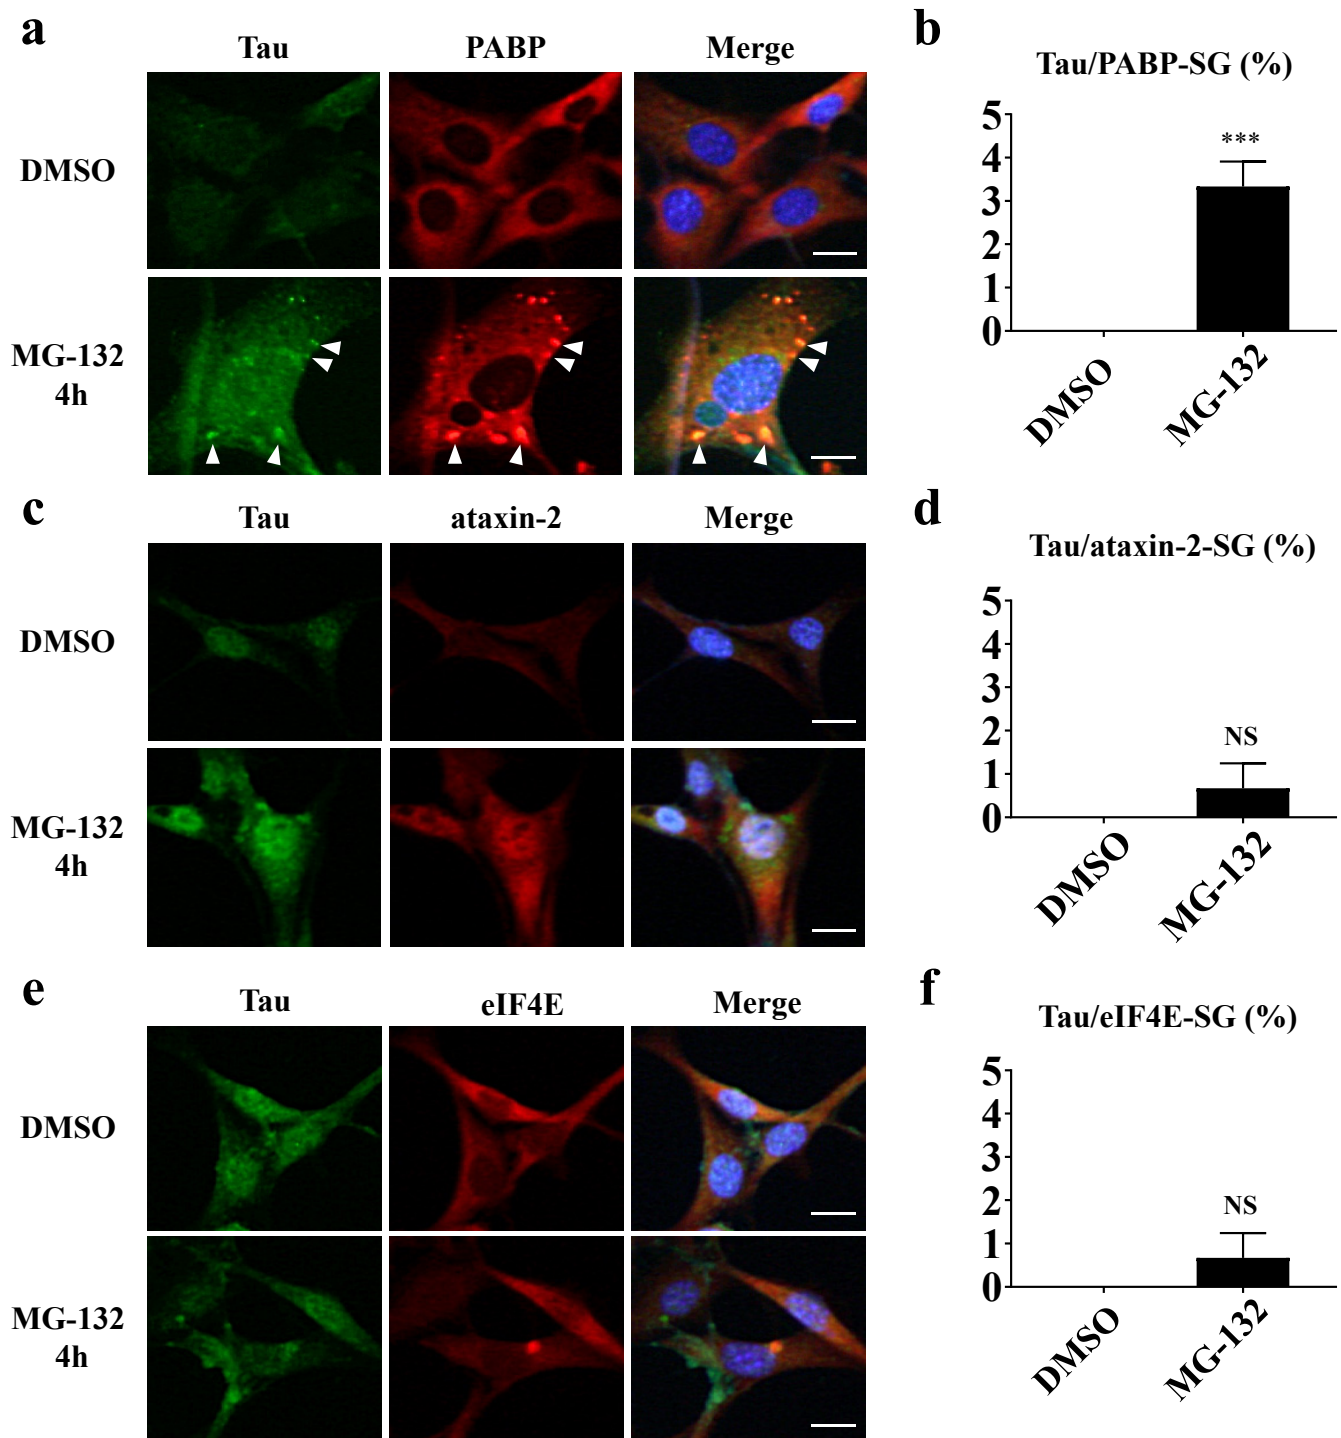

**Supplementary Figure S1.** PABP is colocalized with Tau-SGs in HT22 cells. (a-f) HT22 cells were treated with 5  $\mu$ M MG-132 for 4 h and stained with anti-Tau (TAU-5) plus anti-PABP (a, b), anti-ataxin-2 (c, d) or anti-eIF4E (e, f). Nuclei were stained with Hoechst. Staining was visualized using a fluorescence microscope. Arrowheads indicate the colocalization of Tau with PABP (a). The populations (%) of cells with Tau/PABP-SGs, with Tau/ataxin-2-SGs, Tau/eIF4E-SGs are presented as the mean and SD from three independent experiments in (b, d, f). \*\*\* $P < 0.001$ . NS indicates that a result is not statistically significant. Scale bars: 10  $\mu$ m.

**a**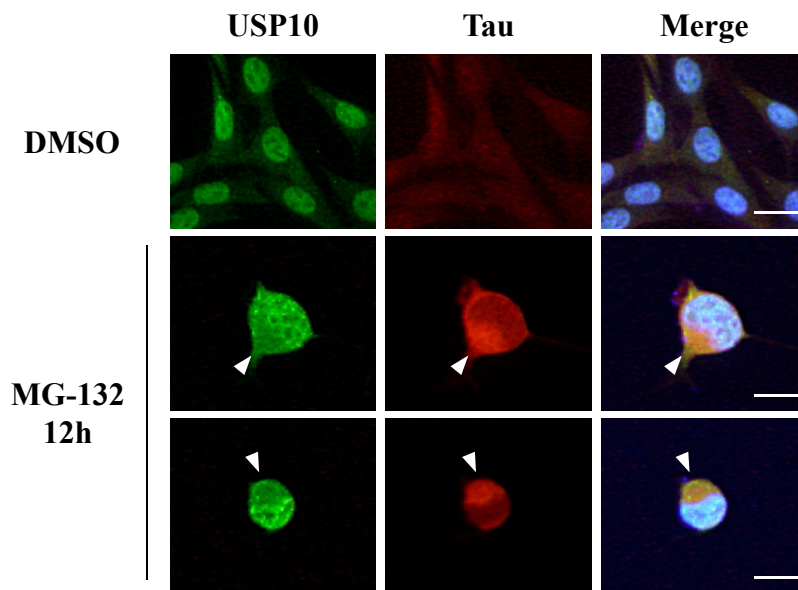**b**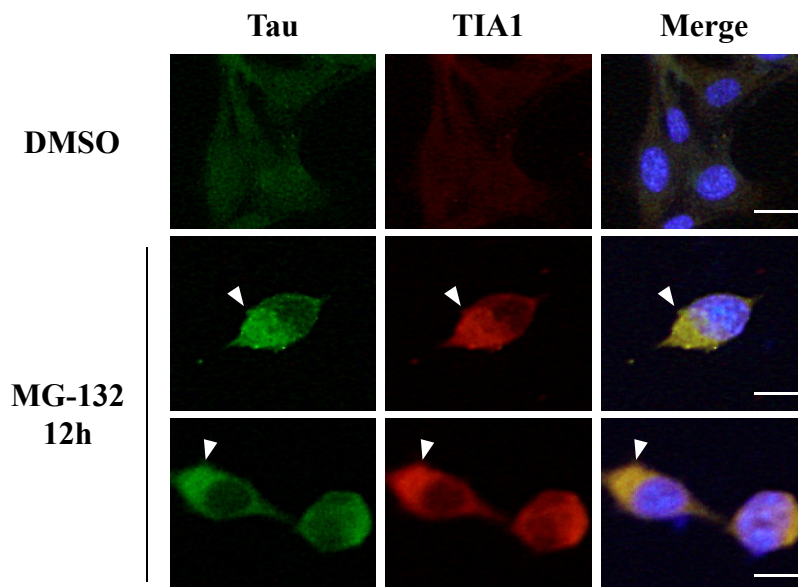

**Supplementary Figure S2.** Tau is localized in aggresomes in HT22 neuronal cells. **(a, b)** HT22 cells were treated with 5  $\mu$ M MG-132 for 12 h and stained with anti-Tau (TAU-5) plus anti-USP10 or anti-Tau (TAU-5) plus anti-TIA1 antibodies. Nuclei were stained with Hoechst. SGs were visualized using a fluorescent microscope. Arrows indicate the colocalization of Tau with TIA1 or USP10. Scale bars: 10  $\mu$ m.

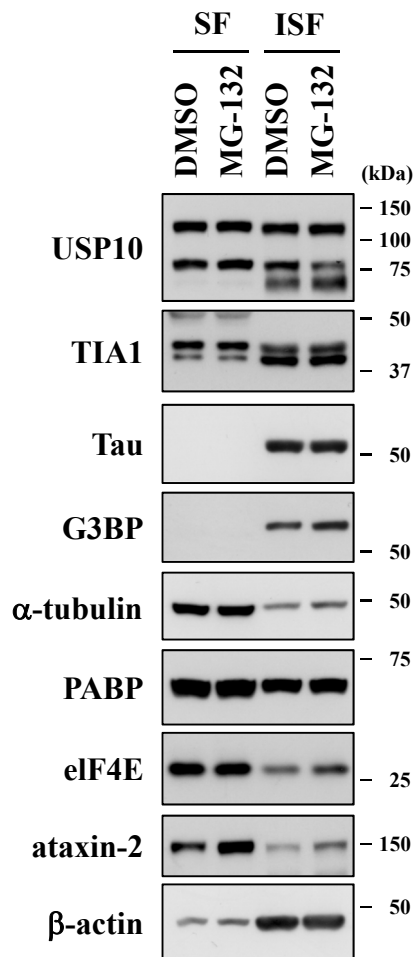

**Supplementary Figure S3.** The expression of SG-associated proteins in HT22 cells treated with MG-132. HT22 cells were treated with 5  $\mu$ M MG-132 for 4 h. NP-40-soluble fractions (SF) and NP-40-insoluble fractions (ISF) were prepared from these cells and characterized by Western blotting using the indicated antibodies.

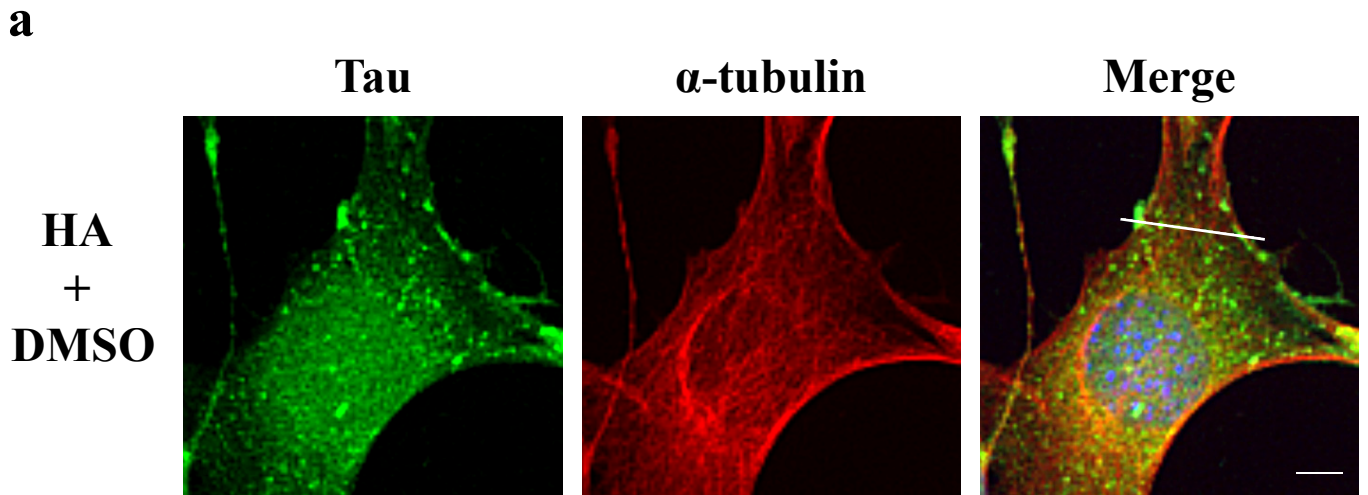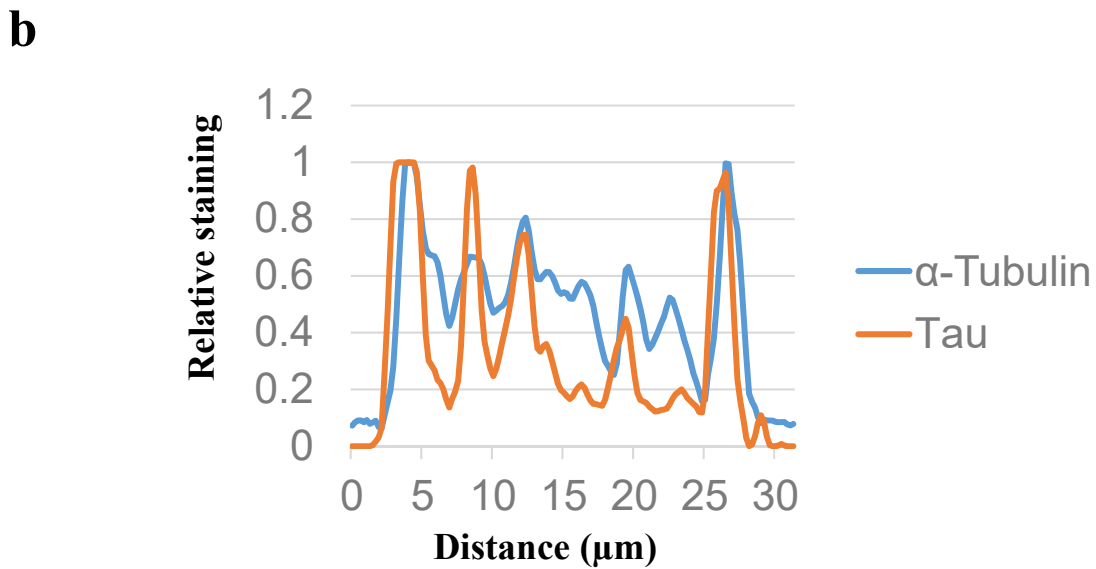

**Supplementary Figure S4.** The colocalization of Tau with  $\alpha$ -tubulin-positive fiber-like structure in HT22 cells. **(a, b)** Representative immunostaining pictures of Tau and  $\alpha$ -tubulin in HT22 cells. The colocalization of Tau with  $\alpha$ -tubulin was analyzed by a line profile analysis. The relative staining levels of Tau and  $\alpha$ -tubulin on the indicated line were presented in **(b)**. Scale bars: 10  $\mu\text{m}$ .

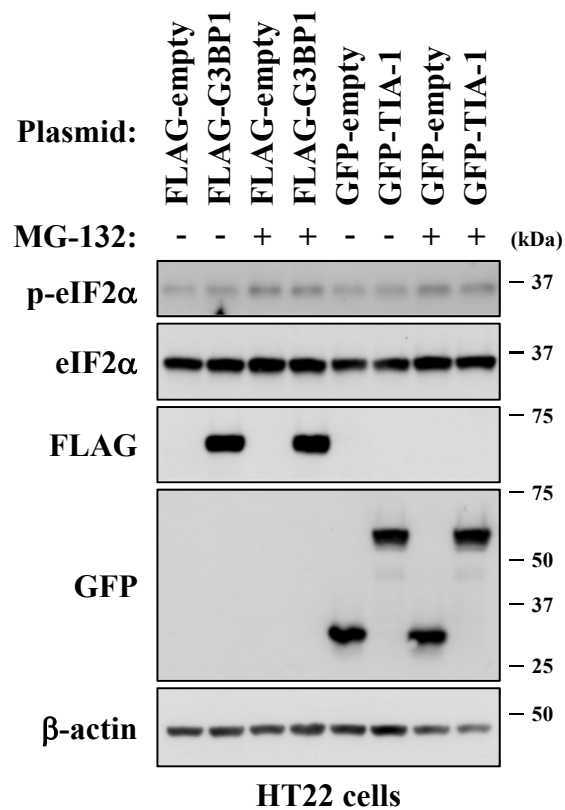

**Supplementary Figure S5.** The levels of eIF2 phosphorylation (p-eIF2 $\alpha$ ) in SG-positive HT22 cells. HT22 cells were transfected with FLAG-G3BP1, GFP-TIA1 or their control plasmids by lipofection using Lipofectamine 2000. At 48 h after transfection, cells were treated with MG-132 for 4 h. Whole cell lysates were prepared and characterized by Western blotting using indicated antibodies.

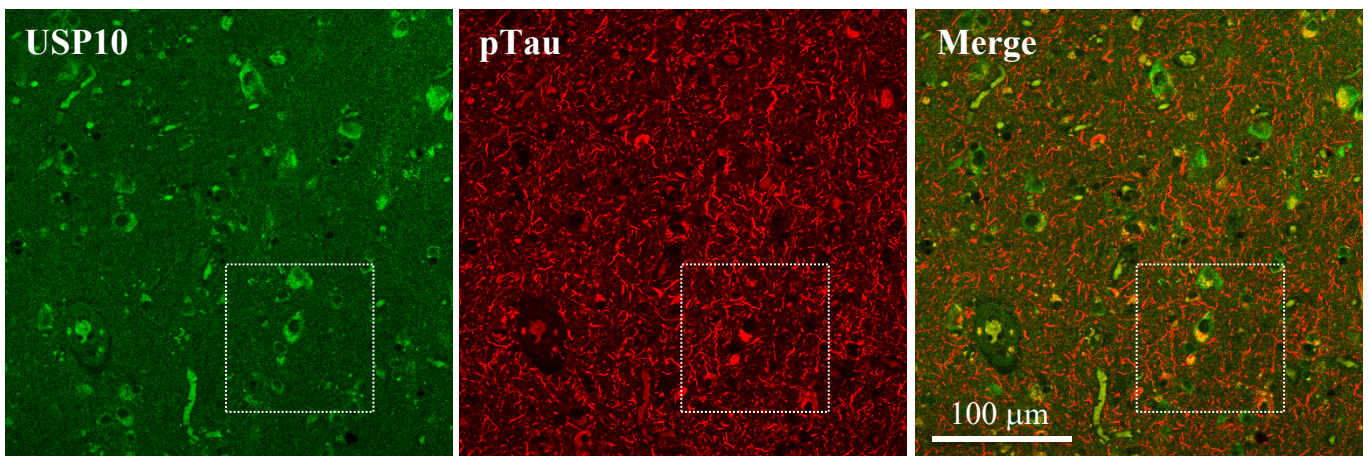

**Supplementary Figure S6.** The colocalization of USP10 with pTau aggregates in AD brain regions. Representative immunohistochemical findings of USP10 and pTau in temporal cortex of AD patients (n=3) are shown. Higher magnification pictures of the areas located in the squares are presented in Fig. 8a.

**Figure 2a**

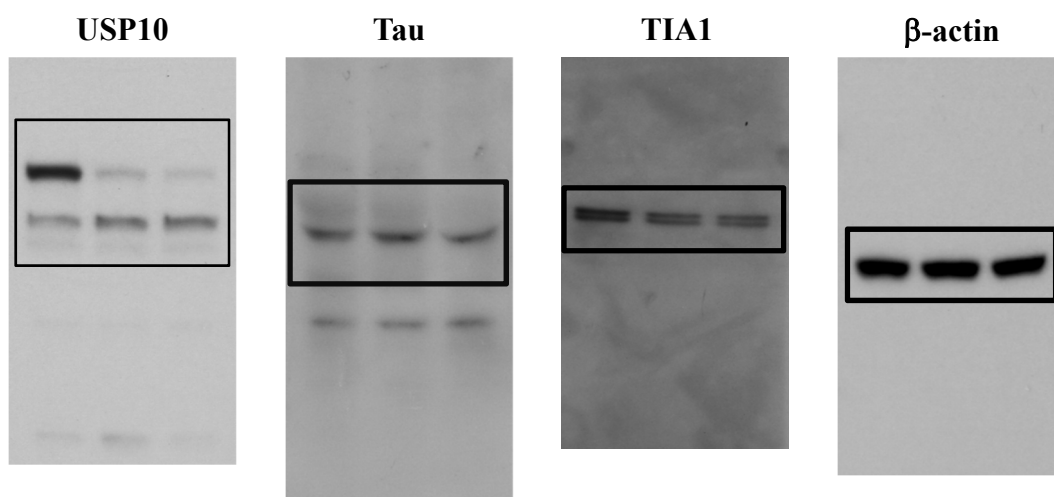

**Supplementary Figure S7.** Full length blots shown in Figure 2a.



**Figure 4c**

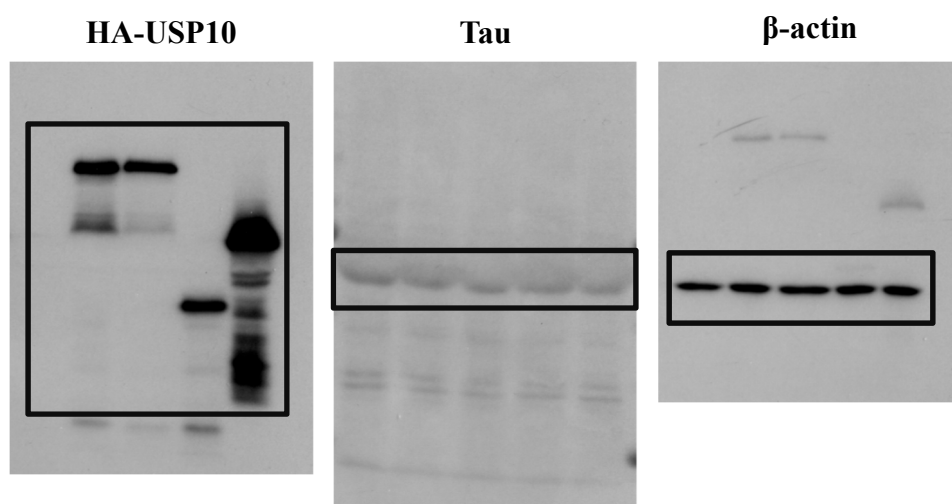

**Supplementary Figure S8.** Full length blots shown in Figure 4c.

**Figure 7a**

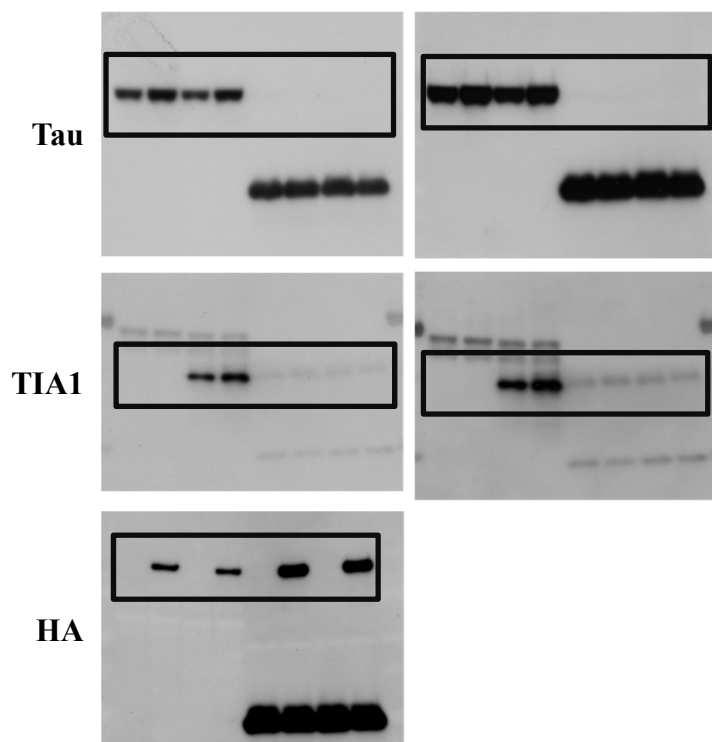

**Figure 7b**

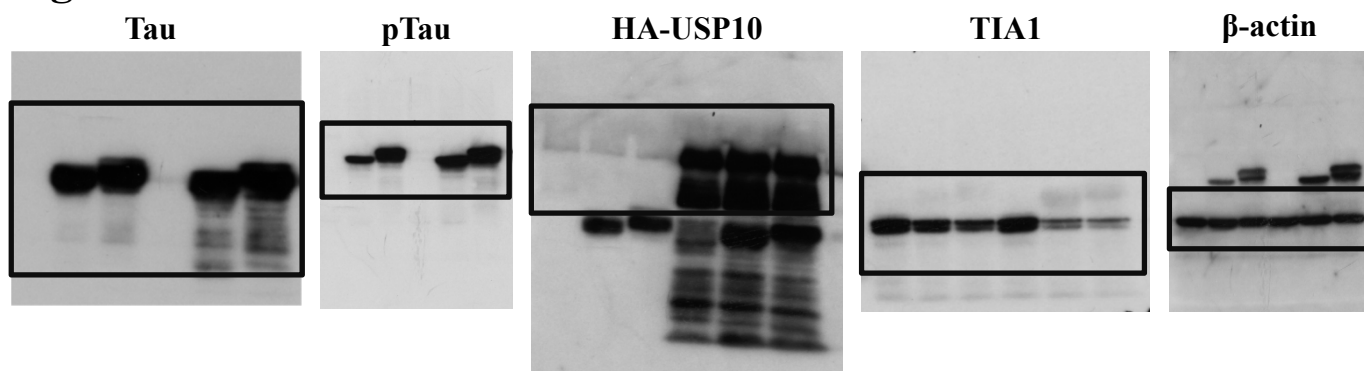

**Figure 7c**

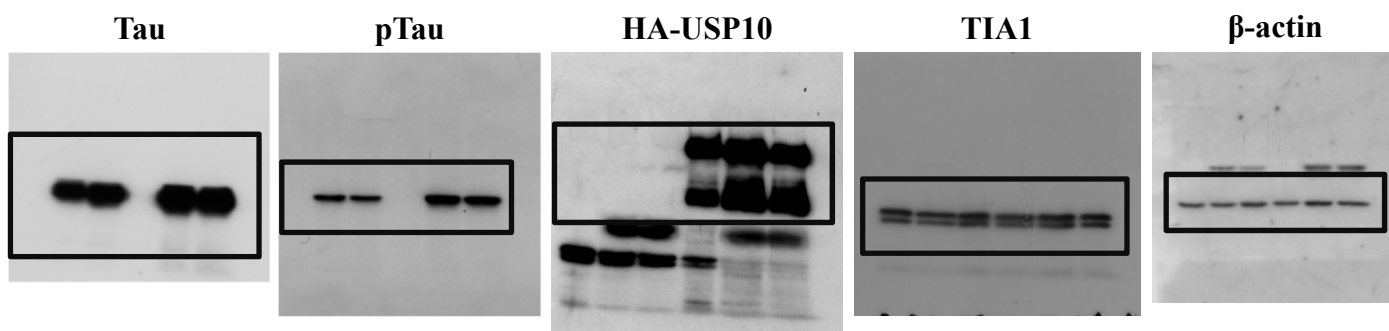

Supplementary Figure S9. Full length blots shown in Figure 7a-c.

**Figure 7d**

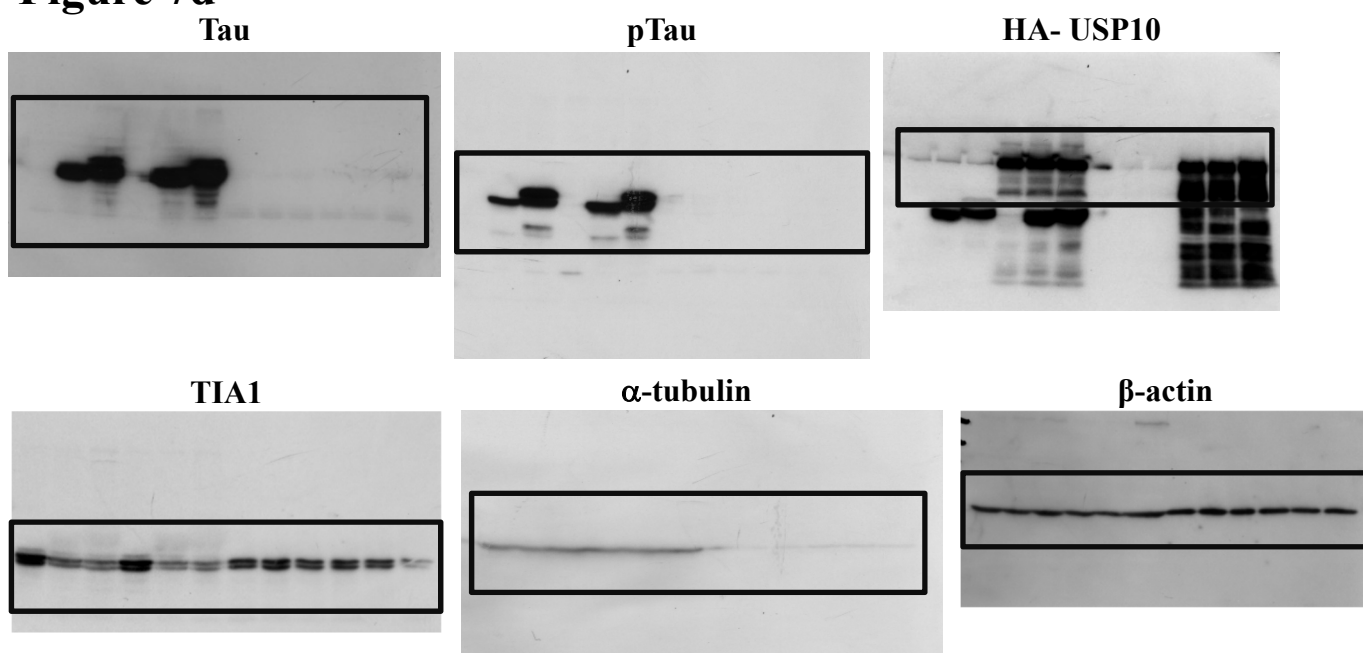

**Figure 7e**

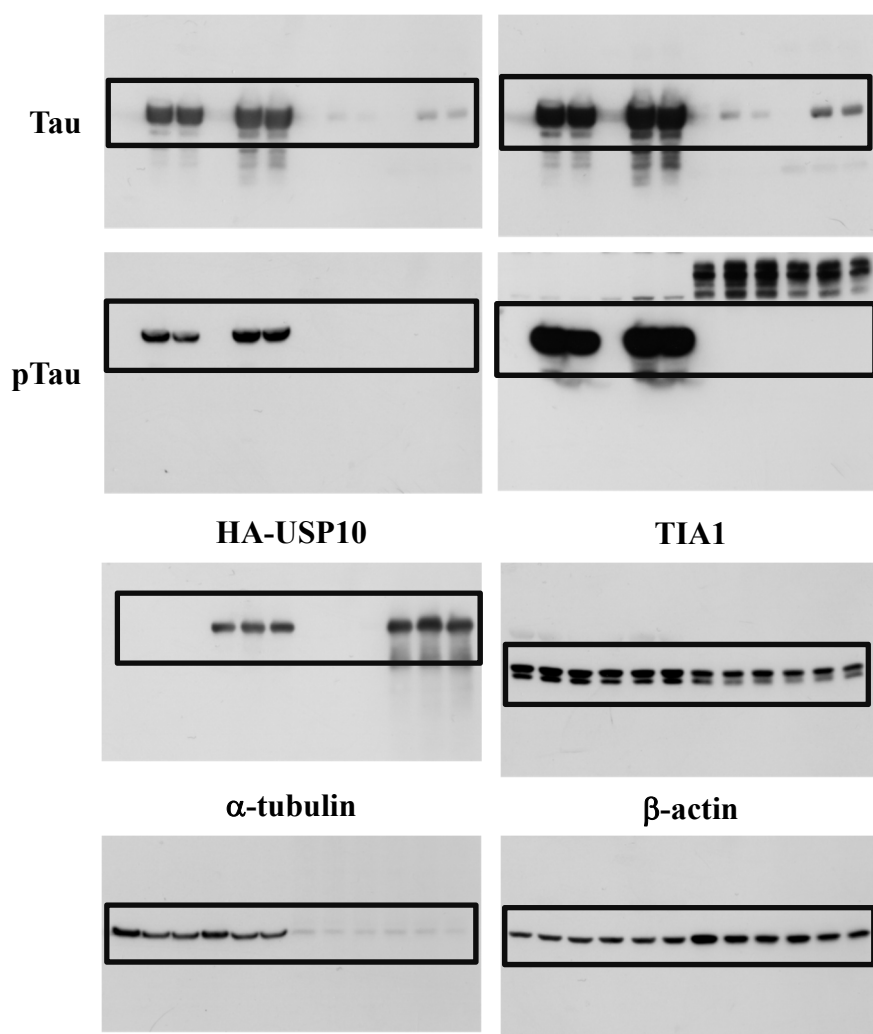

**Supplementary Figure S10.** Full length blots shown in Figure 7d, e.

## Supplementary Figure S3

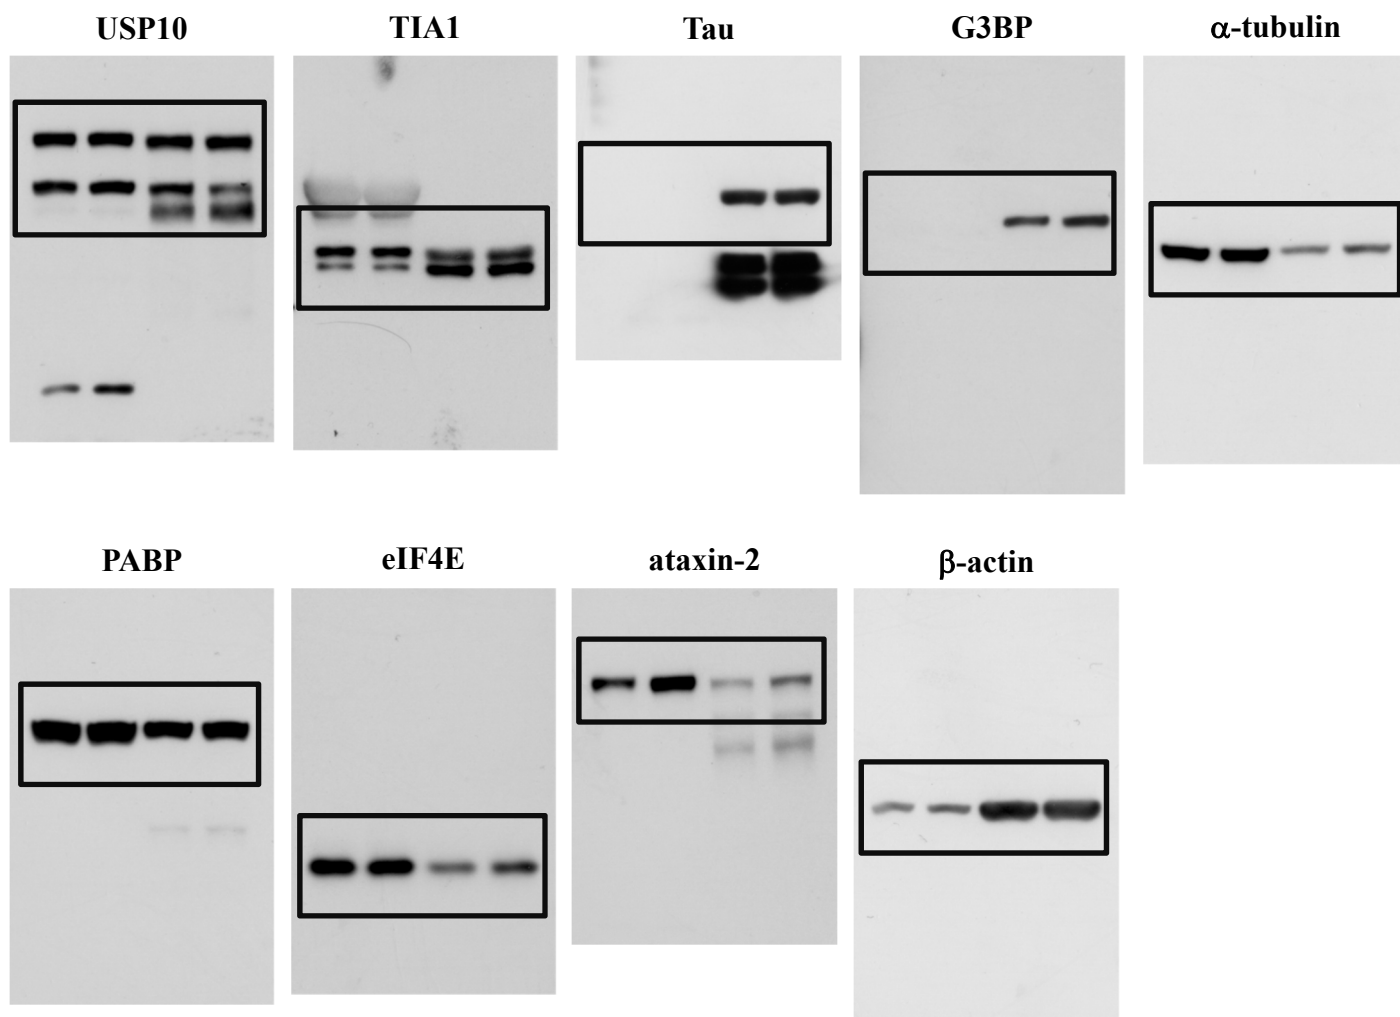

Supplementary Figure S11. Full length blots shown in Supplementary Figure S3.

## Supplementary Figure S5

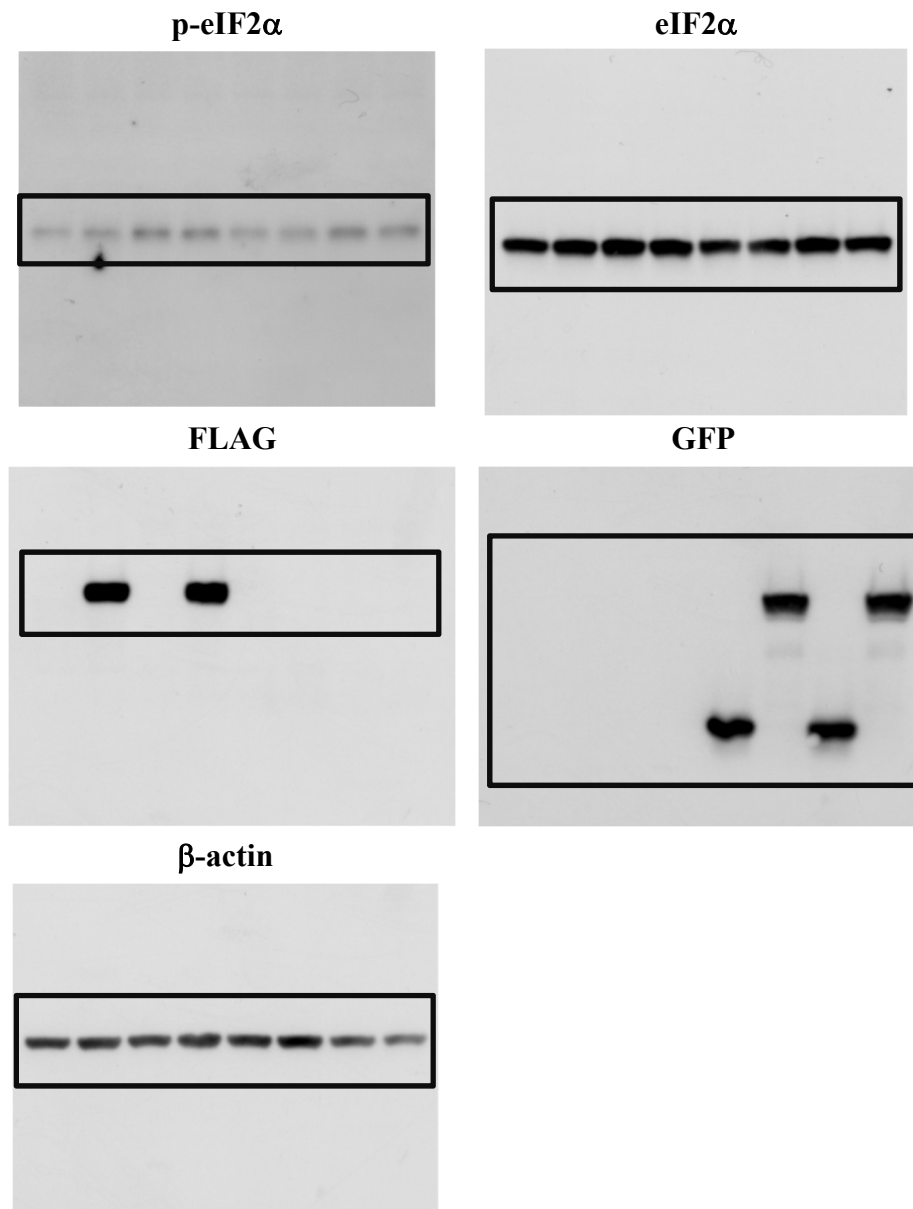

**Supplementary Figure S12.** Full length blots shown in Supplementary Figure S5.
